# Supplementary material for: Topological Data Analysis reveals robust alterations in the whole-brain and frontal lobe functional connectomes in Attention-Deficit/Hyperactivity Disorder
Source: bioRxiv or medRxiv preprint supplement (doi:10.1101/751008), 2019-08-30
Supplement: Supplementary file [file media-1.pdf]

Supplementary Table 1. Pairwise Kendall's coefficient of concordance (KCC) between atlases for the area under the filtration curve.

|             | KCC   | $\chi^2_{176}$ | p        |
|-------------|-------|----------------|----------|
| AAL-CC200   | 0.92  | 324            | 7.52e-11 |
| AAL-P264    | 0.838 | 295            | 4.97e-08 |
| AAL-CC400   | 0.916 | 323            | 1.05e-10 |
| CC200-P264  | 0.884 | 311            | 1.46e-09 |
| CC200-CC400 | 0.973 | 342            | 8.56e-13 |
| P264-CC400  | 0.928 | 327            | 3.9e-11  |
