# Supplementary material for: Topological Data Analysis reveals robust alterations in the whole-brain and frontal lobe functional connectomes in Attention-Deficit/Hyperactivity Disorder
Source: bioRxiv or medRxiv preprint supplement (doi:10.1101/751008), 2019-08-30
Supplement: Supplementary file [file media-2.pdf]

Supplementary Table 2. Pairwise Kendall's coefficient of concordance (KCC) between atlases for the kurtosis of the filtration curve.

|             | KCC   | $\chi_{176}^2$ | P      |
|-------------|-------|----------------|--------|
| AAL-CC200   | 0.648 | 228            | 0.0051 |
| AAL-P264    | 0.591 | 208            | 0.049  |
| AAL-CC400   | 0.648 | 228            | 0.0051 |
| CC200-P264  | 0.593 | 209            | 0.046  |
| CC200-CC400 | 0.655 | 231            | 0.0035 |
| P264-CC400  | 0.609 | 214            | 0.026  |
