# Supplementary material for: Topological Data Analysis reveals robust alterations in the whole-brain and frontal lobe functional connectomes in Attention-Deficit/Hyperactivity Disorder
Source: bioRxiv or medRxiv preprint supplement (doi:10.1101/751008), 2019-08-30
Supplement: Supplementary file [file media-3.pdf]

Supplementary Table 3. Pairwise Kendall's coefficient of concordance (KCC) between atlases for the slope of the filtration curve.

|             | KCC   | $\chi_{176}^2$ | P        |
|-------------|-------|----------------|----------|
| AAL-CC200   | 0.821 | 289            | 1.7e-07  |
| AAL-P264    | 0.705 | 248            | 2.83e-04 |
| AAL-CC400   | 0.848 | 298            | 2.33e-08 |
| CC200-P264  | 0.69  | 243            | 6.13e-04 |
| CC200-CC400 | 0.9   | 317            | 4.03e-10 |
| P264-CC400  | 0.747 | 263            | 2.3e-05  |
