# Supplementary material for: Topological Data Analysis reveals robust alterations in the whole-brain and frontal lobe functional connectomes in Attention-Deficit/Hyperactivity Disorder
Source: bioRxiv or medRxiv preprint supplement (doi:10.1101/751008), 2019-08-30
Supplement: Supplementary file [file media-4.pdf]

Supplementary Table 4. Logistic regression odds ratio for every coefficient for each brain atlas, testing for differences between ADHD and TDC groups. 'Motion': average RMS head motion.

|           | Area     | Kurtosis | Slope   | Sex       | Age       | Motion  |
|-----------|----------|----------|---------|-----------|-----------|---------|
| AAL       | 0.622    | 0.899    | 1.08    | 3.22      | 0.492     | 0.882   |
| (p-value) | (0.0141) | (0.564)  | (0.677) | (8.83e-4) | (1.77e-4) | (0.882) |
| CC200     | 0.612    | 0.889    | 0.893   | 3.4       | 0.487     | 0.95    |
| (p-value) | (0.008)  | (0.561)  | (0.554) | (5.42e-4) | (1.38e-4) | (0.764) |
| P264      | 0.611    | 1.05     | 0.899   | 3.49      | 0.495     | 0.877   |
| (p-value) | (0.013)  | (0.763)  | (0.579) | (4.96e-4) | (1.45e-4) | (0.495) |
| CC400     | 0.572    | 0.719    | 1.13    | 3.33      | 0.521     | 0.871   |
| (p-value) | (0.003)  | (0.351)  | (0.517) | (7.79e-4) | (5.57e-4) | (0.431) |
